# Supplementary material for: Reduction of fetuin-A levels contributes to impairment of Purkinje cells in cerebella of patients with Parkinson’s disease
Source: PubMed Central journal article supplement — BMB Rep. 2023 Mar 24;56(5):308–13. doi: 10.5483/BMBRep.2022-0208 (PMC10230017; doi:10.5483/bmbrep.2022-0208), 2023-03-24
Supplement: bmb-56-5-308-supple.pdf [file bmb-56-5-308-supple.pdf]

## **Reduction of fetuin-A levels contributes to impairment of Purkinje cells in cerebella of patients with Parkinson's disease**

Sunmi Yoon<sup>1</sup>, Napissara Boonpraman<sup>1</sup>, Chae Young Kim<sup>1</sup>, Jong-Seok Moon<sup>2</sup> & Sun Shin Yi<sup>1,3,\*</sup>

<sup>1</sup>BK21 Four Project, Department of Medical Sciences, Soonchunhyang University, Asan 31538,

<sup>2</sup>Department of Integrated Biomedical Science, Soonchunhyang Institute of Medi-bio Science (SIMS), Soonchunhyang University, Cheonan 31151, <sup>3</sup>Department of Biomedical Laboratory Science, College of Medical Sciences, Soonchunhyang University, Asan 31538, Korea

\*Corresponding author.

Tel: +82-41-530-4873; Fax: +82-41-530-3085; E-mail: admiral96@sch.ac.kr

# Supplement 1

## A

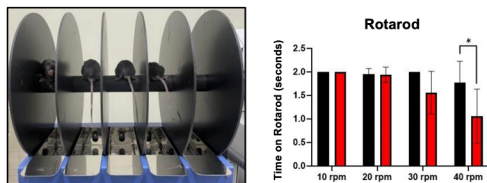

## B

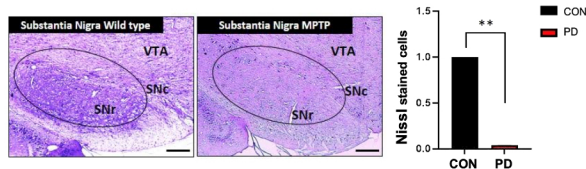

## C

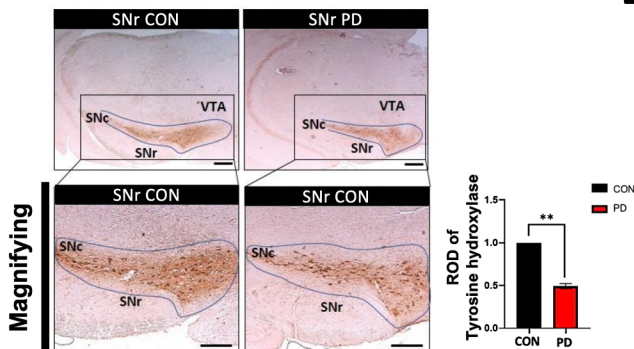

## D

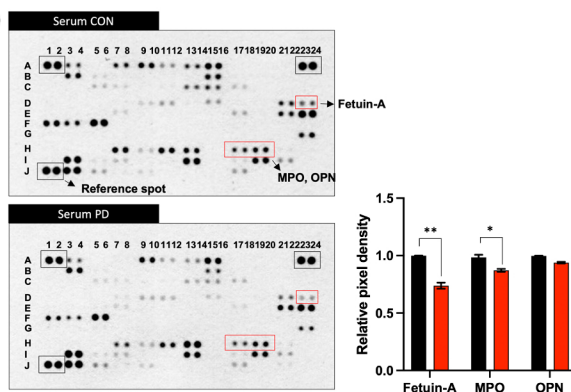

## E

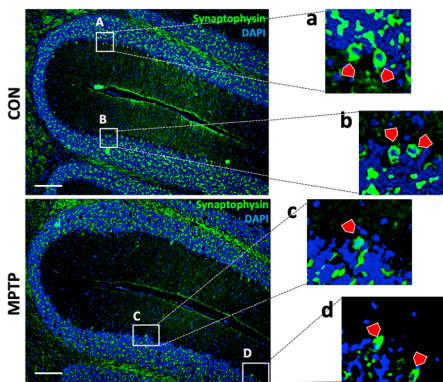

Supplementary 1. Establishment of MPTP-induced PD mouse model and histological cerebellar structure of PD mice and PD patients. (A) Comparison of the motor abilities of animals on Rotarod, (B) the neuron population in the SNr area, (C) IHC analyzed differences in TH-positive cells in the SNr region. (D) Proteome array data was performed using the animal serum. (E) Synaptophysin specific for synaptic vesicles in Purkinje cells (Red arrow heads). GCL=granule cell layer, ML=molecular layer, PCL=Purkinje cell layer, SNr=substantia nigra, SNr=Substantia nigra reticular pars, SNc=Substantia nigra pars, VTA=Ventral tegmental area, Black lined circle=dopaminergic neurons of SNc. Black arrow heads indicate Purkinje cells. \*\*,  $P < 0.01$ ; \*,  $P < 0.05$  vs. CON. Scale bar=100 $\mu$ m. Error bar represents mean $\pm$ SD
